# Supplementary material for: Silica covering driven intensity enhancement and handedness inversion of the CPL signals of the supramolecular assemblies
Source: Royal Society of Chemistry journal article supplement (doi:10.1039/d1nj01327k), 2021-01-01
Supplement: d1nj01327k1.pdf [file d1nj01327k1.pdf]

Electronic Supplementary Material (ESI) for New Journal of Chemistry. This journal is © The Royal Society of Chemistry and the Centre National de la Recherche Scientifique 2021  
Supporting information

## **Silica covering driven intensity enhancement and handedness inversion of the CPL signals of the supramolecular assemblies**

Pan Jiang,<sup>a</sup> Hongkun Li,<sup>\*a,b</sup> Wei Liu, Yi Li,<sup>\*a</sup> Baozong Li<sup>a</sup> and Yonggang Yang<sup>\*a</sup>

<sup>a</sup>State and Local Joint Engineering Laboratory for Novel Functional Polymeric Materials, College of Chemistry, Chemical Engineering and Materials Science, Soochow University, Suzhou 215123, P. R. China. E-mail: H. Li, hkli@suda.edu.cn; Y. Li, liyi@suda.edu.cn; Y. Yang, ygyang@suda.edu.cn

<sup>b</sup>State Key Laboratory of Luminescent Materials and Devices, Key Laboratory of Luminescence from Molecular Aggregates of Guangdong Province, Center for Aggregation-Induced Emission, South China University of Technology, Guangzhou, 510640, China.

### **Table of Contents**

**Fig. S1** WAXRD patterns of the xerogels and hybrid silicas.

**Fig. S2** CD and UV-*vis* spectra of Tolane-1 in (*R*)-(+)-1-phenylethanol and (*S*)-(-)-1-phenylethanol ( $1 \times 10^{-4}$  M).

**Fig. S3** (a) Emission spectra of (L, L)-**T** in methanol/water mixtures with different water fractions ( $f_w$ ), Concentration:  $1.0 \times 10^{-5}$  M; excitation wavelength: 320 nm, (b) Plot of relative emission peak intensity ( $I/I_0$ ) versus  $f_w$  of the methanol-water mixtures, where  $I$  = emission intensity and  $I_0$  = emission intensity in methanol solution.

**Table S1** The  $\Phi_F$  of the solution ( $1.0 \times 10^{-5}$  M in methanol), xerogels of self-assemblies and hybrid silica powders of (L, L)- and (D, D)-**T**

**Table S2** The  $g_{lum}$  values of the solution ( $1.0 \times 10^{-4}$  M in methanol), xerogels of self-assemblies, hybrid silica powders of (L, L)- and (D, D)-**T**

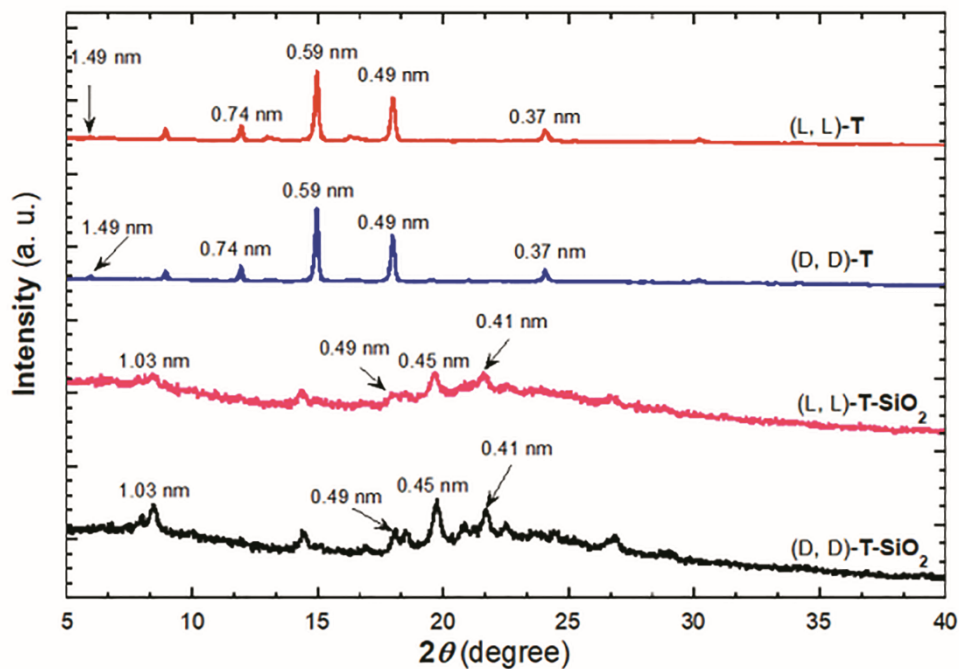

**Fig. S1** WAXRD patterns of the xerogels and hybrid silicas.

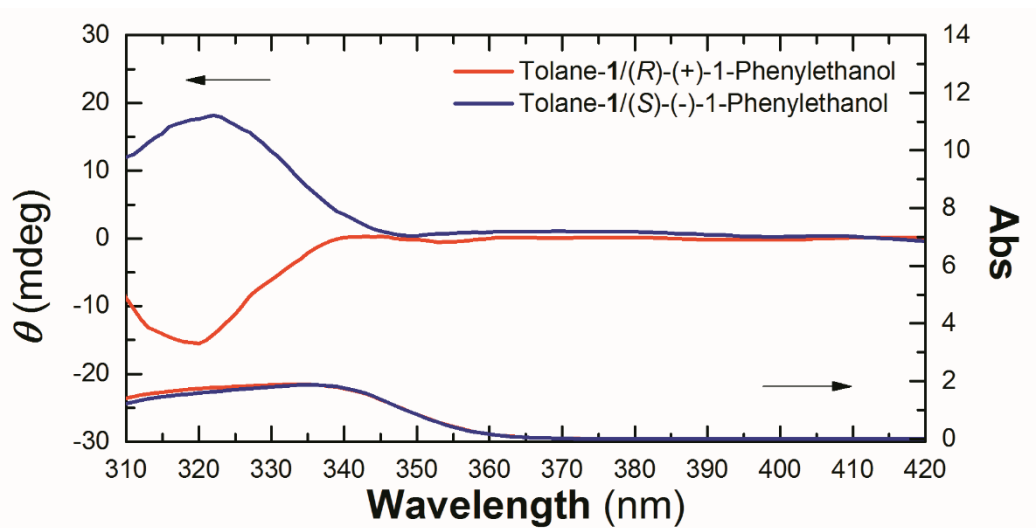

**Fig. S2** CD and UV-*vis* spectra of Tolane-1 in (R)-(+)-1-phenylethanol and (S)-(-)-1-phenylethanol ( $1 \times 10^{-4}$  M).

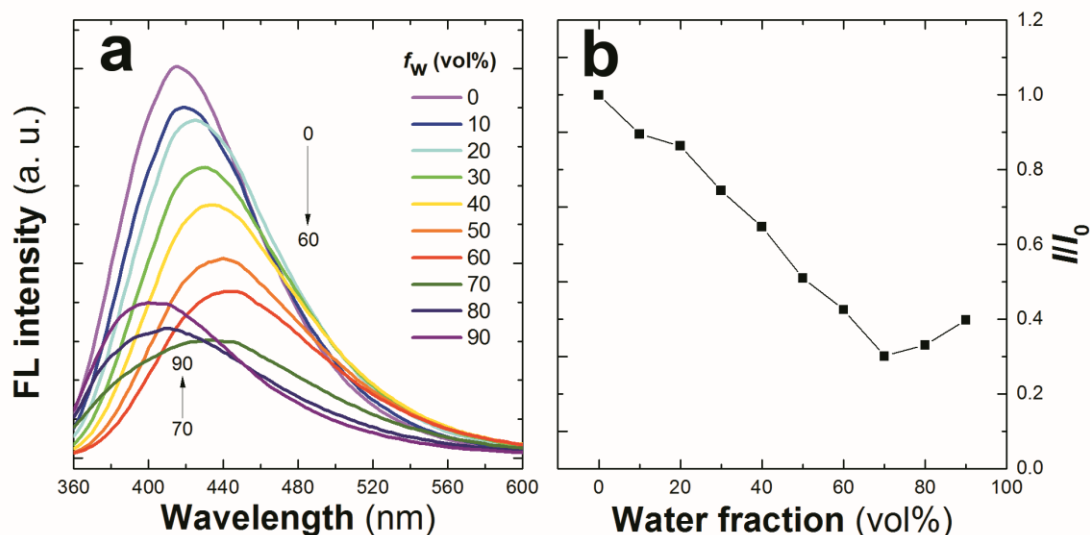

**Fig. S3** (a) Emission spectra of (L, L)-**T** in methanol/water mixtures with different water fractions ( $f_w$ ), Concentration:  $1.0 \times 10^{-5}$  M; excitation wavelength: 320 nm, (b) Plot of relative emission peak intensity ( $I/I_0$ ) versus  $f_w$  of the methanol-water mixtures, where  $I$  = emission intensity and  $I_0$  = emission intensity in methanol solution.

**Table S1** The  $\Phi_F$  of the solution ( $1.0 \times 10^{-5}$  M in methanol), xerogels of self-assemblies and hybrid silica powders of (L, L)- and (D, D)-**T**

| $\Phi_F$                    | (L, L)- <b>T</b> | (D, D)- <b>T</b> |
|-----------------------------|------------------|------------------|
| Solution                    | 34.6%            | 34.7%            |
| Xerogels of self-assemblies | 53.1%            | 51.7%            |
| Hybrid silica powders       | 56.7%            | 56.3%            |

**Table S2** The  $g_{lum}$  values of the solution ( $1.0 \times 10^{-4}$  M in methanol), xerogels of self-assemblies, hybrid silica powders of (L, L)- and (D, D)-**T**

| $g_{lum}$ values            | (L, L)- <b>T</b>      | (D, D)- <b>T</b>      |
|-----------------------------|-----------------------|-----------------------|
| Solution                    | $-8.5 \times 10^{-5}$ | $+6.0 \times 10^{-5}$ |
| Xerogels of self-assemblies | $-2.3 \times 10^{-3}$ | $+1.1 \times 10^{-3}$ |
| Hybrid silica powders       | $+4.4 \times 10^{-3}$ | $-5.4 \times 10^{-3}$ |
